# Supplementary material for: Peptides derived from the integrin β cytoplasmic tails inhibit angiogenesis
Source: PubMed Central journal article supplement (PMC6029062; doi:10.1186/s12964-018-0248-8), 2018-07-03
Supplement: 12964_2018_248_MOESM1_ESM.pdf [file 12964_2018_248_MOESM1_ESM.pdf]

**Supplemental Figures:**

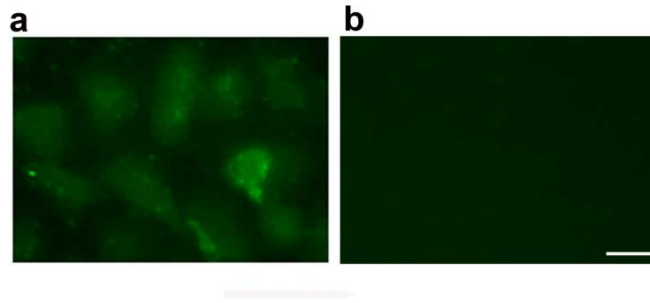

**Figure S1. mβ3CTP is membrane-permeable.** The peptides of mβ3CTP (a) and β3CTP (b) were N-terminally conjugated with FITC and used to incubate with HUVECs at a concentration of 20 μM for 2 hours. After washing, the signal of FITC in HUVECs was evaluated under fluorescent microscopy. Scale bar, 15 μm.

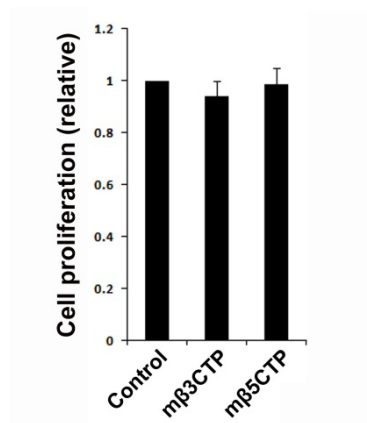

**Figure S2. The antiangiogenic mβ3CTP and mβ5CTP do not suppress RM1 cancer cell proliferation.** RM1 cancer cells were treated with mβ3CTP or mβ5CTP (each at 20 μM) and their effects on cell proliferation were evaluated using CCK-8 cell proliferation assay. Cells without treatment were used as a control.

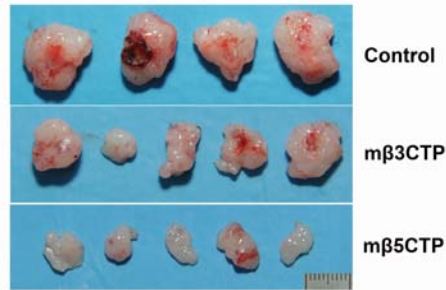

**Figure S3. Both mβ3CTP and mβ5CTP suppress *in vivo* tumor growth.** RM1 cancer cells were subcutaneously injected into BALB/c nude mice. Starting on day 5, the tumor areas were subjected to treatment by local injection of 100 μl of the indicated mβCTP solution (50 μM at a final concentration) every other day. PBS alone was used as a control. Mice were sacrificed at the end point and tumor tissues were isolated and photographed.

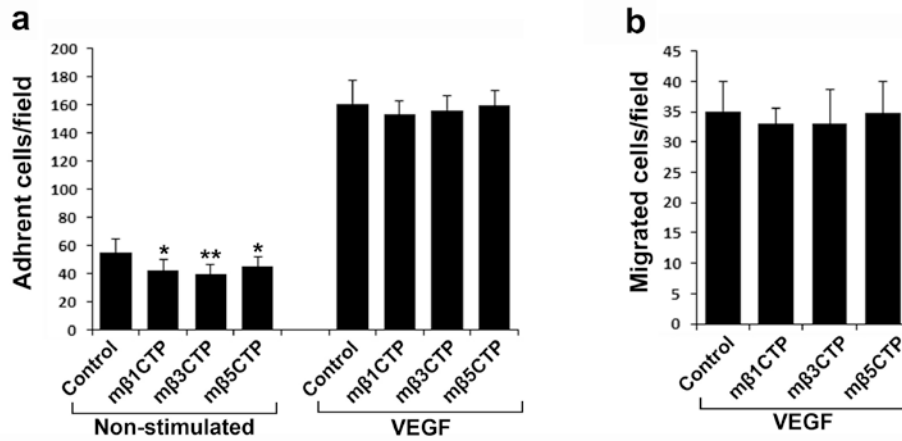

**Figure S4: mβ3CTP and mβ5CTP fail to affect VEGF-induced HUVEC adhesion and migration on vitronectin.** **a** HUVECs were treated with the indicated mβCTPs (20 μM) and allowed to adhere to immobilized vitronectin for 30 min in the absence or presence of VEGF(20 ng/ml). The adherent cells were fixed, stained and counted as described in methods. **b** HUVECs were treated with the indicated mβCTPs (20 μM) and allowed to migrate on Transwell membrane coated with vitronectin for 8 hours in the presence of VEGF (20 ng/ml). The migrated cells were fixed, stained, photographed and counted. Results were expressed as means ± SD of five samples; statistical significance was analyzed using Student's *t* test (\*,  $p < 0.05$ ; \*\*,  $p < 0.01$ ).

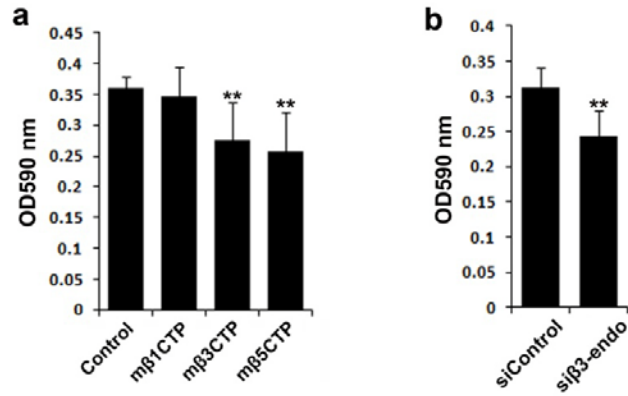

**Figure S5. The antiangiogenic mβCTPs and siRNA against β3-endonexin suppress HUVEC proliferation.** HUVECs were treated with the indicated mβCTPs (a) or siRNA against β3-endonexin (b). Their effects on cell proliferation were evaluated using the MTT assay. Results were expressed as means ± SD of five samples; statistical significance was analyzed using Student's *t* test (\*\*,  $p < 0.01$ ).
